# Supplementary material for: Prevalence of reduced lung diffusing capacity and CT scan findings in smokers without airflow limitation: a population-based study
Source: PubMed Central journal article supplement — BMJ Open Respir Res. 2023 Jan 26;10(1):e001468. doi: 10.1136/bmjresp-2022-001468 (PMC9884864; doi:10.1136/bmjresp-2022-001468), 2023-01-26
Supplement: bmjresp-2022-001468supp001.pdf [file bmjresp-2022-001468supp001.pdf]

## Online Supplementary materials

**TITLE: Prevalence of reduced lung diffusing capacity and CT scan findings in smokers without airflow limitation: A population-based study**

**Authors' full names:** Francisco García-Río, Marc Miravittles, Joan B Soriano, Borja G. Cosío, Juan José Soler-Cataluña, Ciro Casanova, Pilar de Lucas, Inmaculada Alfageme, José Miguel Rodríguez González-Moro, Guadalupe Sánchez, and Julio Ancochea

Supplementary Tables 1-8

**Supplementary Table 1.** Demographic and clinical characteristics of the study subjects without airflow limitation\*

|                                                    | Non airflow subjects with DLCO determination<br>(n=405) | Non airflow limitation subjects without DLCO determination<br>(n=7610) | P value |
|----------------------------------------------------|---------------------------------------------------------|------------------------------------------------------------------------|---------|
| Females, n (%)                                     | 218 (53.8)                                              | 4085 (53.7)                                                            | 0.958   |
| Age, yr                                            | 60 ± 11                                                 | 59 ± 11                                                                | 0.281   |
| BMI, Kg/m <sup>2</sup>                             | 27.4 ± 4.8                                              | 27.6 ± 5.0                                                             | 0.168   |
| Level of studies, n (%)                            |                                                         |                                                                        | 0.177   |
| No studies                                         | 0.7                                                     | 1.8                                                                    |         |
| Primary education                                  | 19.0                                                    | 20.8                                                                   |         |
| Secondary education                                | 18.8                                                    | 21.7                                                                   |         |
| University                                         | 61.2                                                    | 55.3                                                                   |         |
| Lives alone, n (%)                                 | 68 (16.8)                                               | 1129 (14.8)                                                            | 0.158   |
| Pack-years                                         | 25 ± 21                                                 | 24 ± 21                                                                | 0.717   |
| Comorbidity Charlson index                         | 0.3 ± 0.8                                               | 0.3 ± 0.8                                                              | 0.703   |
| COTE index                                         | 1.1 ± 2.3                                               | 1.0 ± 2.2                                                              | 0.173   |
| Pre-bronchodilator FEV <sub>1</sub> , z-score      | 0.10 ± 1.02                                             | 0.05 ± 1.03                                                            | 0.314   |
| Pre-bronchodilator FEV <sub>1</sub> /FVC, z-score  | -0.26 ± 0.81                                            | -0.19 ± 0.76                                                           | 0.143   |
| Post-bronchodilator FEV <sub>1</sub> , s-score     | 0.12 ± 0.99                                             | 0.07 ± 1.01                                                            | 0.114   |
| Post-bronchodilator FEV <sub>1</sub> /FVC, z-score | -0.15 ± 0.79                                            | -0.16 ± 0.80                                                           | 0.246   |

\*Data are mean ± standard deviation or number (percentage). Comparisons were made between groups using the Student's t-test or chi-squared test. *Abbreviations:* BMI, body mass index; FVC, forced vital capacity; FEV<sub>1</sub>, forced expiratory volume in 1 second

**Supplementary Table 2.** Comparison of diffusing capacity between subgroups of current or former smoker subjects\*

|                              | DLCO, z-score        | DLCO/VA, z-score   |
|------------------------------|----------------------|--------------------|
| <b>Sex</b>                   |                      |                    |
| Males (n=83)                 | -0.34 ± 0.80         | 0.01 ± 0.12        |
| Females (n=89)               | -0.68 ± 0.57         | -0.11 ± 0.12       |
| P value                      | 0.001                | <0.001             |
| <b>Chronic cough</b>         |                      |                    |
| Yes (n=39)                   | -0.67 ± 0.64         | -0.03 ± 0.13       |
| Non (n=131)                  | -0.47 ± 0.72         | -0.06 ± 0.13       |
| P value                      | 0.130                | 0.289              |
| <b>Chronic bronchitis</b>    |                      |                    |
| Yes (n=13)                   | -0.35 (-0.63- -0.05) | 0.00 (0.07-0.12)   |
| Non (n=146)                  | -0.53 (-0.95- -0.08) | -0.05 (-0.14-0.03) |
| P value                      | 0.683                | 0.145              |
| <b>Chronic expectoration</b> |                      |                    |
| Yes (n=35)                   | -0.53 (-0.96- -0.22) | -0.04 (-0.11-0.03) |
| Non (n=135)                  | -0.50 (-0.94- -0.01) | -0.05 (-0.14-0.03) |
| P value                      | 0.288                | 0.724              |
| <b>Dyspnoea</b>              |                      |                    |
| Yes (n=22)                   | -0.37 (-0.91-0.25)   | -0.04 (-0.12-0.07) |
| Non (n=147)                  | -0.53 (-0.94- -0.09) | -0.05 (-0.14-0.03) |
| P value                      | 0.993                | 0.688              |
| <b>Wheezing</b>              |                      |                    |
| Yes (n=69)                   | -0.62 ± 0.70         | -0.06 ± 0.13       |
| Non (n=102)                  | -0.45 ± 0.71         | -0.05 ± 0.13       |
| P value                      | 0.132                | 0.614              |

\*Data are mean ± standard deviation or median (interquartile range) according to their distribution. Comparisons were performed by t-Student or Mann-Whitney tests. *Abbreviations:* DLCO, lung diffusing capacity for carbon monoxide; VA, alveolar volume.

**Supplementary Table 3.** Relation between diffusion parameters and clinical, functional, and morphological variables in current smokers with a cumulative smoking exposure higher than 10 pack x years\*

|                                                   | DLCO, z-score  |              | DLCO/VA, z-score |              |
|---------------------------------------------------|----------------|--------------|------------------|--------------|
|                                                   | r              | P value      | r                | P value      |
| Age, years                                        | 0.170          | 0.145        | 0.139            | 0.235        |
| BMI, Kg/m <sup>2</sup>                            | 0.051          | 0.664        | <b>0.227</b>     | <b>0.043</b> |
| Pack x years                                      | -0.005         | 0.967        | 0.121            | 0.300        |
| Fagerström test                                   | <b>-0.253</b>  | <b>0.030</b> | <b>-0.236</b>    | <b>0.043</b> |
| Charlson comorbidity index                        | -0.051         | 0.666        | 0.132            | 0.259        |
| COTE index                                        | -0.061         | 0.605        | -0.063           | 0.590        |
| CAT total score                                   | -0.080         | 0.494        | 0.001            | 0.991        |
| mMRC dyspnoea scale                               | 0.032          | 0.617        | 0.011            | 0.841        |
| Baseline SaO <sub>2</sub> , %                     | 0.087          | 0.458        | -0.053           | 0.652        |
| Exhaled CO, ppm                                   | <b>-0.278</b>  | <b>0.017</b> | -0.184           | 0.116        |
| Pre-bronchodilator FVC, z-score                   | <b>0.375</b>   | <b>0.001</b> | <b>-0.232</b>    | <b>0.045</b> |
| Pre-bronchodilator FEV <sub>1</sub> , z-score     | <b>0.360</b>   | <b>0.002</b> | -0.159           | 0.177        |
| Pre-bronchodilator FEV <sub>1</sub> /FVC, z-score | 0.062          | 0.594        | 0.133            | 0.256        |
| 6MWD, m                                           | 0.181          | 0.120        | 0.136            | 0.243        |
| Haemoglobin, g/dl                                 | 0.146          | 0.222        | <b>0.289</b>     | <b>0.014</b> |
| Eosinophils, %                                    | 0.070          | 0.554        | 0.118            | 0.319        |
| Fibrinogen, g/l                                   | -0.001         | 0.992        | -0.078           | 0.544        |
| C-reactive protein, mg/l                          | -0.149         | 0.236        | -0.150           | 0.234        |
| Albumin, g/l                                      | <b>0.680</b>   | <b>0.031</b> | -0.219           | 0.544        |
| BODE index                                        | -0.089         | 0.448        | 0.035            | 0.767        |
| YPAS - physical activity summary                  | 0.098          | 0.594        | 0.010            | 0.958        |
| Total emphysema volume, %                         | 0.039          | 0.760        | -0.004           | 0.978        |
| Low density volume, %                             | -0.020         | 0.879        | -0.058           | 0.651        |
| P15, HU                                           | -0.030         | 0.813        | -0.047           | 0.715        |
| Secondary bronchi WA, %                           | -0.092         | 0.475        | -0.092           | 0.476        |
| Pulmonary artery diameter, mm                     | <b>-0.3304</b> | <b>0.015</b> | <b>-0.400</b>    | <b>0.001</b> |
| Pulmonary artery:aorta ratio                      | 0.143          | 0.263        | 0.161            | 0.207        |

\*Pearson correlation coefficient (r) and P-value are shown. *Abbreviations:* DLCO, lung diffusing capacity of carbon monoxide; VA, alveolar volume; BMI, body mass index; CAT, Chronic Obstructive Pulmonary Disease assessment test; SaO<sub>2</sub>, oxygen saturation; CO, carbon monoxide; FVC, forced vital capacity; FEV<sub>1</sub>, forced expiratory volume at 1 second; 6MWD, six-minute walk distance; BODE, Body Obstructive Dyspnoea Exercise; YPAS, Yale physical activity survey; P15, 15<sup>th</sup> percentile; HU, Hounsfield units; WA, wall area

**Supplementary Table 4.** Correlation between diffusion parameters and clinical, functional, and morphological variables in former smokers with a cumulative smoking exposure higher than 10 pack x years\*

|                                                   | DLCO, z-score |                  | DLCO/VA, z-score |              |
|---------------------------------------------------|---------------|------------------|------------------|--------------|
|                                                   | r             | P value          | r                | P value      |
| Age, years                                        | 0.032         | 0.795            | 0.139            | 0.175        |
| BMI, Kg/m <sup>2</sup>                            | 0.052         | 0.613            | <b>0.302</b>     | <b>0.003</b> |
| Pack-years                                        | -0.089        | 0.384            | -0.108           | 0.293        |
| Charlson comorbidity index                        | -0.006        | 0.953            | 0.047            | 0.646        |
| COTE index                                        | -0.158        | 0.123            | -0.006           | 0.956        |
| CAT total score                                   | -0.181        | 0.076            | -0.047           | 0.650        |
| mMRC dyspnoea scale                               | 0.099         | 0.189            | 0.054            | 0.346        |
| Baseline SaO <sub>2</sub> , %                     | 0.061         | 0.553            | -0.083           | 0.420        |
| Exhaled CO, ppm                                   | -0.082        | 0.425            | -0.070           | 0.497        |
| Pre-bronchodilator FVC, z-score                   | <b>0.336</b>  | <b>0.001</b>     | -0.119           | 0.246        |
| Pre-bronchodilator FEV <sub>1</sub> , z-score     | <b>0.399</b>  | <b>&lt;0.001</b> | 0.014            | 0.891        |
| Pre-bronchodilator FEV <sub>1</sub> /FVC, z-score | 0.187         | 0.067            | <b>0.220</b>     | <b>0.031</b> |
| 6MWD, m                                           | <b>0.202</b>  | <b>0.048</b>     | -0.118           | 0.249        |
| Haemoglobin, g/dL                                 | 0.110         | 0.289            | 0.044            | 0.672        |
| Eosinophils, %                                    | -0.007        | 0.944            | 0.160            | 0.122        |
| Fibrinogen, g/L                                   | -0.111        | 0.335            | -0.109           | 0.344        |
| C-reactive protein, mg/L                          | -0.024        | 0.822            | 0.036            | 0.736        |
| Albumin, g/L                                      | -0.048        | 0.882            | -0.274           | 0.389        |
| BODE index                                        | -0.024        | 0.818            | <b>0.259</b>     | <b>0.010</b> |
| YPAS - physical activity summary                  | 0.221         | 0.108            | 0.167            | 0.227        |
| Total emphysema volume, %                         | -0.051        | 0.639            | -0.018           | 0.872        |
| Low density volume, %                             | 0.070         | 0.519            | 0.142            | 0.192        |
| P15, HU                                           | -0.132        | 0.226            | -0.174           | 0.109        |
| Secondary bronchi WA, %                           | 0.098         | 0.368            | 0.046            | 0.676        |
| Pulmonary artery diameter, mm                     | <b>-0.229</b> | <b>0.034</b>     | <b>-0.314</b>    | <b>0.003</b> |
| Pulmonary artery:aorta ratio                      | -0.053        | 0.627            | 0.017            | 0.876        |

\*Pearson correlation coefficient (r) and P-value are shown. *Abbreviations:* DLCO, lung diffusing capacity of carbon monoxide; VA, alveolar volume; BMI, body mass index; CAT, Chronic Obstructive Pulmonary Disease assessment test; SaO<sub>2</sub>, oxygen saturation; CO, carbon monoxide; FVC, forced vital capacity; FEV<sub>1</sub>, forced expiratory volume at 1 second; 6MWD, six-minute walk distance; BODE, Body Obstructive Dyspnoea Exercise; YPAS, Yale physical activity survey; P15, 15<sup>th</sup> percentile; HU, Hounsfield units; WA, wall area.

**Supplementary Table 5.** Comparison between current smoker subjects according to their lung diffusing capacity\*

|                                                   | <b>Reduced DLCO</b><br>(n=20) | <b>Normal DLCO</b><br>(n=55) | <b>P</b> |
|---------------------------------------------------|-------------------------------|------------------------------|----------|
| Females, n (%)                                    | 15 (75.0)                     | 31 (56.4)                    | 0.115    |
| Age, years                                        | 59 (52-59)                    | 60 (59-65)                   | 0.088    |
| BMI, Kg/m <sup>2</sup>                            | 31.5 (30.2-34.4)              | 26.8 (16.8-29.2)             | 0.834    |
| Level of studies                                  |                               |                              | 0.419    |
| No studies                                        | 0                             | 0                            |          |
| Primary education                                 | 2 (10.0)                      | 5 (9.1)                      |          |
| Secondary education                               | 6 (30.0)                      | 17 (30.9)                    |          |
| University                                        | 11 (55.0)                     | 33 (60.0)                    |          |
| Lives alone                                       | 1 (5.0)                       | 13 (23.6)                    | 0.060    |
| Pack-years                                        | 24 (23-45)                    | 34 (34-44)                   | 0.161    |
| Fagerström test                                   | 4 (4-6)                       | 3 (3-4)                      | 0.707    |
| Charlson comorbidity index                        | 0 (0-0)                       | 0 (0-0)                      | 0.730    |
| COTE index                                        | 6 (3-6)                       | 0 (0-0)                      | 0.229    |
| CAT total score                                   | 5 (5-16)                      | 9 (8-12)                     | 0.610    |
| mMRC dyspnoea level                               |                               |                              | 0.218    |
| 0                                                 | 13 (65.0)                     | 41 (74.5)                    |          |
| 1                                                 | 6 (30.0)                      | 14 (25.5)                    |          |
| 2                                                 | 0                             | 0                            |          |
| 3                                                 | 1 (5.0)                       | 0                            |          |
| Chronic cough, n (%)                              | 7 (36.8)                      | 20 (36.4)                    | 0.590    |
| Chronic bronchitis, n (%)                         | 2 (12.5)                      | 8 (16.0)                     | 0.544    |
| Chronic expectoration, n (%)                      | 5 (25.0)                      | 16 (29.1)                    | 0.485    |
| Wheezing, n (%)                                   | 12 (60.0)                     | 30 (55.6)                    | 0.471    |
| Baseline oxygen saturation, %                     | 96 (95-97)                    | 96 (95-97)                   | 0.782    |
| Exhaled CO, ppm                                   | 38 (32-46)                    | 7 (6-21)                     | 0.068    |
| Pre-bronchodilator FVC, z-score                   | -0.41 (-1.00-0.42)            | 0.33 (-0.32-0.80)            | 0.013    |
| Pre-bronchodilator FEV <sub>1</sub> , z-score     | -0.30 (-1.28- -0.02)          | -0.15 (-0.72-0.80)           | 0.076    |
| Pre-bronchodilator FEV <sub>1</sub> /FVC, z-score | -0.62 (-0.83- -0.14)          | -0.44 (-1.05-0.16)           | 0.815    |
| 6MWD, m                                           | 522 (512-562)                 | 577 (554-600)                | 0.185    |
| Haemoglobin, g/dl                                 | 14.3 (13.7-14.7)              | 16.4 (15.0-16.4)             | 0.203    |
| Eosinophils, %                                    | 1.1 (0.6-2.8)                 | 2.0 (1.6-2.8)                | 0.701    |
| Fibrinogen, mg/dL                                 | 3.4 (3.1-3.6)                 | 3.9 (3.5-3.9)                | 0.417    |
| C-reactive protein, mg/L                          | 0.2 (0.2-0.7)                 | 0.4 (0.3-0.5)                | 0.420    |
| Albumin                                           | 4.2 (4.2-4.3)                 | 4.4 (4.4-4.6)                | 0.014    |
| BODE index                                        |                               |                              | 0.068    |
| 0-2 points (survival: 80%)                        | 55 (100)                      | 18 (90.0)                    |          |
| 3-4 (survival: 67%)                               | 0                             | 2 (10.0)                     |          |
| YPAS - physical activity summary                  | 29 (26-42)                    | 53 (43-61)                   | 0.073    |
| Total emphysema volume, %                         | 0.5 (0.3-0.6)                 | 0.2 (0.1-0.2)                | 0.987    |
| Low density volume, %                             | 41 (40-50)                    | 17 (12-35)                   | 0.528    |
| P15, HU                                           | -906 (-912 - -905)            | -876 (-897 - -865)           | 0.670    |
| Secondary bronchi WA, %                           | 22.2 (21.0-24.0)              | 24.1 (22.2-25.8)             | 0.499    |
| Pulmonary artery diameter, mm                     | 28 (25-29)                    | 24 (23-24)                   | 0.014    |
| Pulmonary artery:aorta ratio                      | 0.77 (0.72-0.79)              | 0.70 (0.65-0.70)             | 0.269    |

\*Data are median (interquartile range) or number (frequency) according to their type. Comparisons were performed by Student's t, Mann-Whitney or chi-square tests. *Abbreviations:* DLCO, lung diffusing capacity for carbon monoxide; BMI, body mass index; CAT, Chronic Obstructive Pulmonary Disease assessment test; mMRC, modified Medical Research Council; CO, carbon monoxide; FVC, forced vital capacity; FEV<sub>1</sub>, forced expiratory volume at 1 second; 6MWD, 6-minute walk distance; BODE, body obstructive dyspnoea exercise; P15, 15<sup>th</sup> percentile; WA, wall area

**Supplementary Table 6.** Comparison between former smoker subjects according to their lung diffusing capacity\*

|                                                   | Reduced DLCO<br>(n=14) | Normal DLCO<br>(n=83) | P     |
|---------------------------------------------------|------------------------|-----------------------|-------|
| Females, n (%)                                    | 6 (42.9)               | 37 (44.6)             | 0.571 |
| Age, years                                        | 63 (55-65)             | 63 (55-68)            | 0.541 |
| BMI, Kg/m <sup>2</sup>                            | 28.3 (21.9-29.7)       | 27.8 (25.8-30.7)      | 0.426 |
| Level of studies                                  |                        |                       | 0.028 |
| No studies                                        | 1 (7.1)                | 0                     |       |
| Primary education                                 | 5 (35.7)               | 19 (22.9)             |       |
| Secondary education                               | 0                      | 14 (16.9)             |       |
| University                                        | 8 (57.1)               | 50 (60.2)             |       |
| Live alone                                        | 4 (28.6)               | 18 (21.7)             | 0.395 |
| Pack-years                                        | 25 (19-50)             | 27 (19-37)            | 0.750 |
| Fagerström test                                   | 0 (0-0)                | 0 (0-0)               | 1.0   |
| Charlson comorbidity index                        | 0 (0-0)                | 0 (0-0)               | 0.794 |
| COTE index                                        | 0 (0-0)                | 0 (0-0)               | 0.217 |
| CAT total score                                   | 6 (1-10)               | 6 (3-11)              | 0.789 |
| mMRC dyspnoea level                               |                        |                       | 0.090 |
| 0                                                 | 10 (71.4)              | 64 (77.1)             |       |
| 1                                                 | 2 (14.3)               | 16 (19.3)             |       |
| 2                                                 | 1 (7.1)                | 3 (3.6)               |       |
| 3                                                 | 1 (7.1)                | 0                     |       |
| Chronic cough, n (%)                              | 1 (7.1)                | 11 (13.4)             | 0.446 |
| Chronic bronchitis, n (%)                         | 0                      | 3 (3.8)               | 0.633 |
| Chronic expectoration, n (%)                      | 2 (14.3)               | 12 (14.8)             | 0.661 |
| Wheezing, n (%)                                   | 3 (21.4)               | 24 (28.9)             | 0.413 |
| Baseline oxygen saturation, %                     | 96 (96-97)             | 96 (95-97)            | 0.920 |
| Exhaled CO, ppm                                   | 3 (1-6)                | 2 (2-4)               | 0.782 |
| Pre-bronchodilator FVC, z-score                   | -0.48 (-1.24-0.40)     | 0.37 (-0.28-1.02)     | 0.008 |
| Pre-bronchodilator FEV <sub>1</sub> , z-score     | -0.47 (-1.32- -0.30)   | 0.08 (-0.49-0.97)     | 0.003 |
| Pre-bronchodilator FEV <sub>1</sub> /FVC, z-score | -0.23 (-0.94-0.24)     | -0.29 (-0.82-0.29)    | 0.666 |
| 6MWD, m                                           | 503 (448-541)          | 535 (464-590)         | 0.257 |
| Haemoglobin, g/dl                                 | -                      | 15.1 (13.4-15.8)      | -     |
| Eosinophils, %                                    | -                      | 2.1 (0.1-3.6)         | -     |
| Fibrinogen, mg/dL                                 | -                      | 3.6 (3.4-4.6)         | -     |
| C-reactive protein, mg/L                          | -                      | 0.4 (0.2-0.9)         | -     |
| Albumin                                           | -                      | 4.9 (4.6-40.7)        | -     |
| BODE index                                        |                        |                       | 0.054 |
| 0-2 points (survival: 80%)                        | 12 (85.7)              | 82 (98.8)             |       |
| 3-4 (survival: 67%)                               | 2 (14.3)               | 1 (1.2)               |       |
| YPAS - physical activity summary                  | 53 (44-55)             | 60 (47-87)            | 0.255 |
| Total emphysema volume, %                         | 2.2 (0.2-4.1)          | 1.1 (0.5-3.0)         | 0.640 |
| Low density volume, %                             | 58 (47-66)             | 52 (47-64)            | 0.615 |
| P15, HU                                           | -920 (-930 - -911)     | -910 (-935 - -900)    | 0.343 |
| Secondary bronchi WA, %                           | 22.8 (20.9-31.5)       | 25.1 (22.1-28.2)      | 0.574 |
| Pulmonary artery diameter, mm                     | 25 (23-28)             | 24 (21-27)            | 0.097 |
| Pulmonary artery:aorta ratio                      | 0.76 (0.70-0.84)       | 0.75 (0.66-0.83)      | 0.806 |



\*Data are median (interquartile range) or number (frequency) according to their type. Comparisons were performed by Student's t, Mann-Whitney or chi-square tests. *Abbreviations*: DLCO, lung diffusing capacity for carbon monoxide; BMI, body mass index; CAT, Chronic Obstructive Pulmonary Disease assessment test; mMRC, modified Medical Research Council; CO, carbon monoxide; FVC, forced vital capacity; FEV<sub>1</sub>, forced expiratory volume at 1 second; 6MWD, 6-minute walk distance; BODE, body obstructive dyspnoea exercise; P15, 15<sup>th</sup> percentile; WA, wall area

**Supplementary Table 7.** Multiple logistic regression model to detect reduced DLCO in current smoker subjects\*

| Variable                        | B      | Standard error | P     | OR    | 95%CI        |
|---------------------------------|--------|----------------|-------|-------|--------------|
| Pre-bronchodilator FVC, z-score | -0.732 | 0.301          | 0.015 | 0.481 | 0.2675-0.867 |
| Exhaled CO, ppm                 | 0.026  | 0.048          | 0.039 | 1.014 | 1.001-1.028  |
| Constant                        | -1.058 | 0.281          | -     | -     | -            |

\*Exhaled CO level, pre-bronchodilator FVC, pre-bronchodilator FEV<sub>1</sub>, serum albumin level and pulmonary artery diameter were entered into the model. The BODE index was not entered because it was considered redundant and not strictly applicable to subjects without airflow limitation.

*Abbreviations:* FVC, forced vital capacity; CO, carbon monoxide; B, regression coefficient; OR, odds ratio; CI, confidence interval

**Supplementary Table 8.** Multiple logistic regression model to detect reduced DLCO in former smoker subjects\*

| Variable                        | B      | Standard error | P     | OR    | 95%CI       |
|---------------------------------|--------|----------------|-------|-------|-------------|
| Pre-bronchodilator FVC, z-score | -0.993 | 0.345          | 0.004 | 0.371 | 0.188-0.729 |
| Exhaled CO, ppm                 | 0.018  | 0.023          | 0.047 | 1.016 | 1.000-1.034 |
| Constant                        | -1.886 | 0.331          | -     | -     | -           |

\*Exhaled CO level, pre-bronchodilator FVC, pre-bronchodilator FEV<sub>1</sub>, serum albumin level and pulmonary artery diameter were entered into the model. The BODE index was not entered because it was considered redundant and not strictly applicable to subjects without airflow limitation.

*Abbreviations:* FVC, forced vital capacity; CO, carbon monoxide; B, regression coefficient; OR, odds ratio; CI, confidence interval
